# Supplementary material
Source: PubMed Central journal article supplement (PMC5189643)
Supplement: supp_2015-0285_Supplemental_Figures.pdf [file supp_2015-0285_Supplemental_Figures.pdf]

Supplemental Figure – Furuta et al.

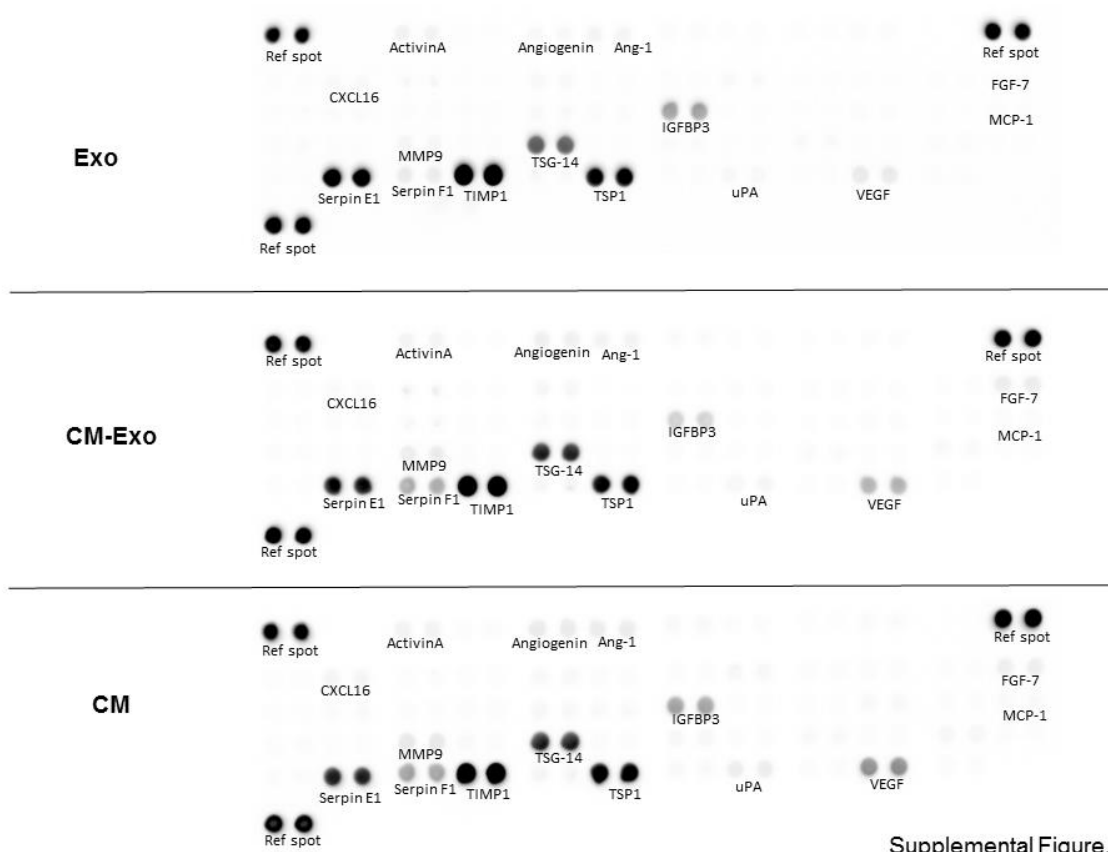

Supplemental Figure. 1A

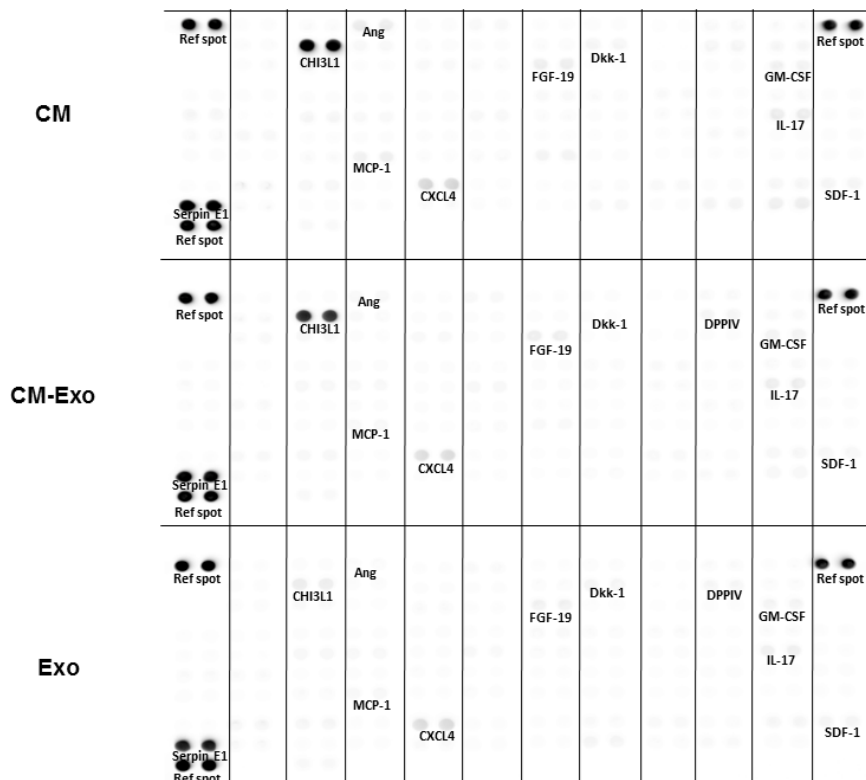

Supplemental Figure. 1B

**Figure S1. Profiling of angiogenic factors and Cytokine in MSC-exosomes, CM-Exo, and CM by Antibody Array.** (A) The antibody array for Angiogenic factors (55 proteins) in MSC-exosomes, CM-Exo, and CM. (B) The antibody array for cytokines (102 proteins) in MSC-exosomes, CM-Exo, and CM. CM, conditioned medium; CM-Exo, exosome-depleted conditioned medium.
